# Supplementary material
Source: Springer Nature journal article supplement (https://www.springermedizin.de/resource/supplementary/12936_2014_3326_MOESM7_ESM.pdf/9545666)
Supplement: MOESM7 [file 9545666]

|     |     |     |     |      |     |     |     |     |
|-----|-----|-----|-----|------|-----|-----|-----|-----|
| 5.7 | 0.9 | 0.6 | 3.2 | 29.5 | 1.0 | 0.3 | 0.6 | 9.4 |
|-----|-----|-----|-----|------|-----|-----|-----|-----|

|     |     |     |
|-----|-----|-----|
| 0.5 | 0.5 | 0.3 |
| 0.9 | 0.7 | 0.6 |
| 6.0 | 6.5 | 7.5 |

74.8
